# Supplementary material for: Genetic characterization of inbred lines from Shaan A and B groups for identifying loci associated with maize grain yield
Source: PubMed Central journal article supplement (PMC6108135; doi:10.1186/s12863-018-0669-9), 2018-08-23

**a**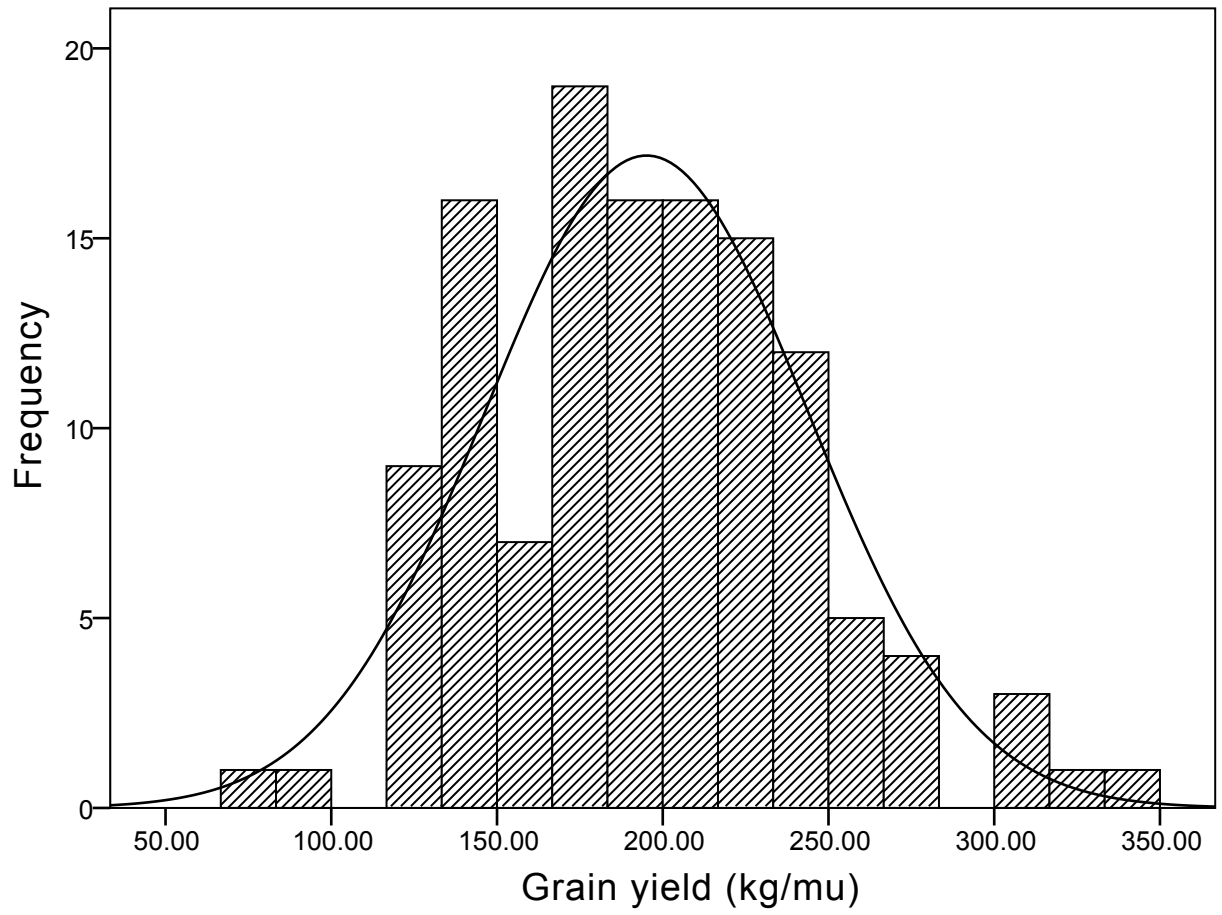**b**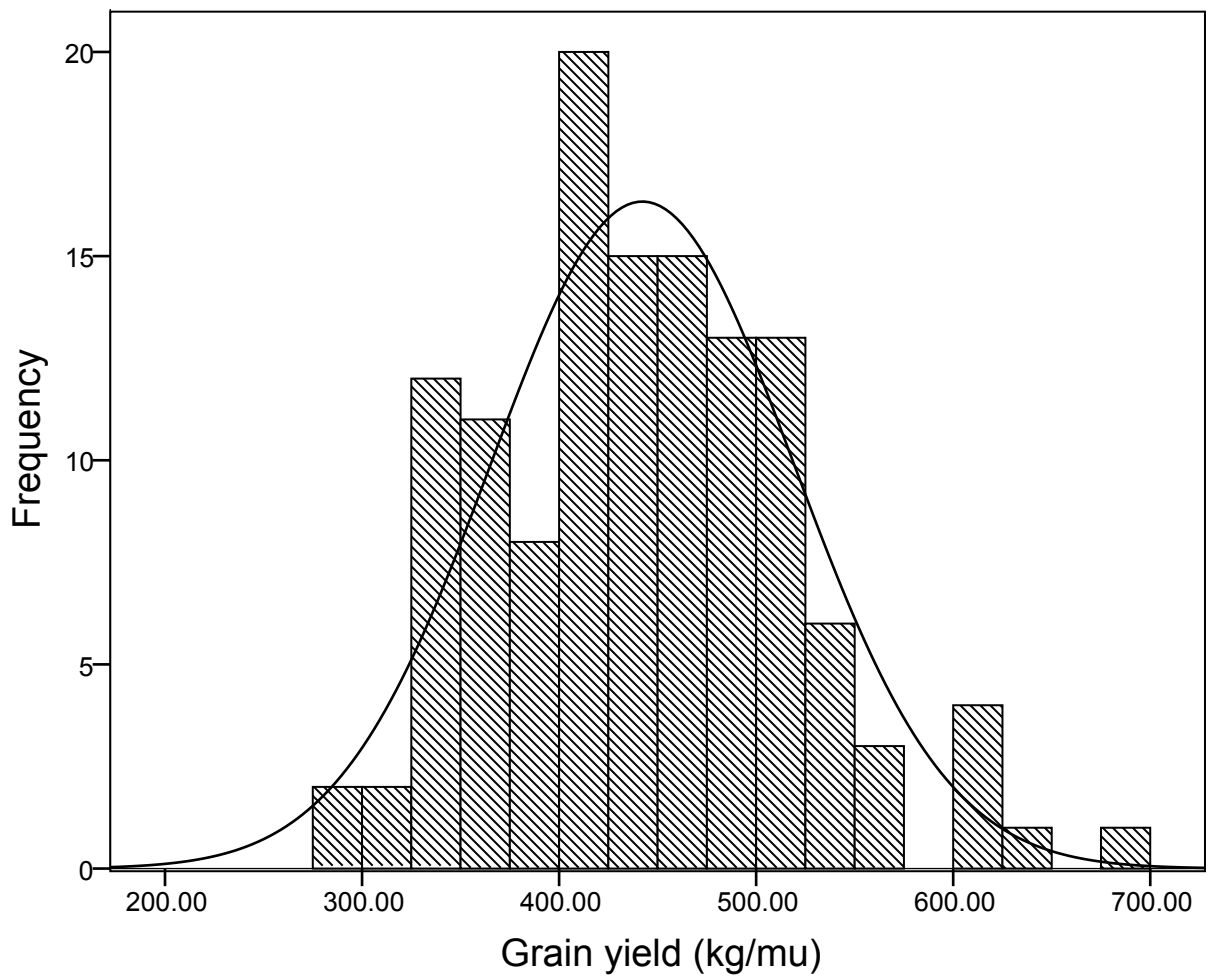

Supplement: 12863_2018_669_MOESM7_ESM.pdf [file 12863_2018_669_MOESM7_ESM.pdf]
